# Supplementary material
Source: Springer Nature journal article supplement (https://www.springermedizin.de/resource/supplementary/12885_2012_3827_MOESM2_ESM.pdf/9464534)

**(a)**

ACCESS#5 ID: 373089687  
AMB PESQ  
17/09/2005  
006Y  
M

IP:20  
10:44:05

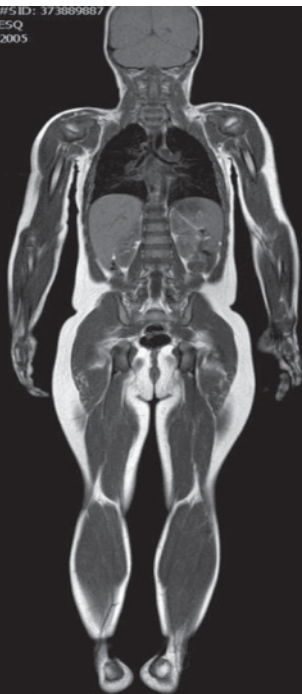

R  
2  
6  
7

L  
2  
6  
7

Hospital de Clinicas de POA

IP

MobView  
CORPO TOTAL

**(b)**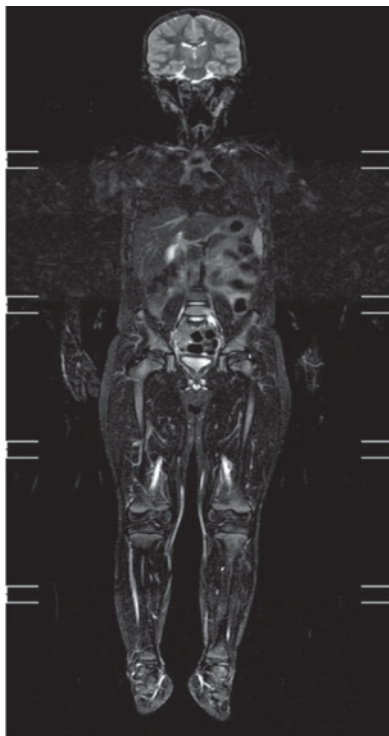**(c)**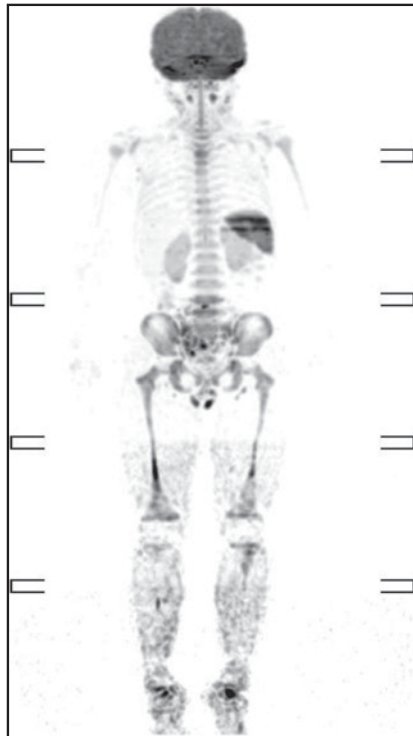

Supplement: MOESM2 [file 9464534]
